# Supplementary material
Source: publisher site journal article supplement (https://www.dovepress.com/article/455612)
Supplement: Supplementary file 1 [file get_supplementary_file.php]

**Supplementary Table 1**

Baseline patient clinicopathological characteristics

| Variable | Total  (n = 562) | NER High  (n = 68) | NER Low  (n = 494) | P |
| --- | --- | --- | --- | --- |
| Gender |  |  |  | 0.192 |
| Female | 93 (16.55) | 15 (22.06) | 78 (15.79) |  |
| Male | 469 (83.45) | 53 (77.94) | 416 (84.21) |  |
| Age (years) |  |  |  | 0.559 |
| ≤47 | 78 (13.88) | 11 (16.18) | 67 (13.56) |  |
| ＞47 | 484 (86.12) | 57 (83.82) | 427 (86.44) |  |
| HbsAg (ng/ml) |  |  |  | 0.968 |
| Negative | 42 (7.47) | 5 (7.35) | 37 (7.49) |  |
| Positive | 520 (92.53) | 63 (92.65) | 457 (92.51) |  |
| AFP (ng/ml) |  |  |  | 0.125 |
| ≤400 | 415 (73.84) | 45 (66.18) | 370 (74.90) |  |
| ＞400 | 147 (26.16) | 23 (33.82) | 124 (25.10) |  |
| Neutrophil count (10^9/L) |  |  |  | <0.001 |
| ≤4.7 | 503 (89.5) | 44 (64.71) | 459 (92.91) |  |
| ＞4.7 | 59 (10.5) | 24 (35.29) | 35 (7.09) |  |
| Lymphocyte count (10^9/L) |  |  |  | 0.006 |
| ≤1.01 | 73 (12.99) | 16 (23.53) | 57 (11.54) |  |
| ＞1.01 | 489 (87.01) | 52 (76.47) | 437 (88.46) |  |
| Monocyte count (10^9/L) |  |  |  | 0.233 |
| ≤0.59 | 474 (84.34) | 54 (79.41) | 420 (85.02) |  |
| ＞0.59 | 88 (15.66) | 14 (20.59) | 74 (14.98) |  |
| Basophil count (10^9/L) |  |  |  | 0.024 |
| ≤0.01 | 219 (38.97) | 35 (51.47) | 184 (37.25) |  |
| ＞0.01 | 343 (61.03) | 33 (48.53) | 310 (62.75) |  |
| Eosinophil count (10^9/L) |  |  |  | <0.001 |
| ≤0.03 | 80 (14.23) | 54 (79.41) | 26 (5.26) |  |
| ＞0.03 | 482 (85.77) | 14 (20.59) | 468 (94.74) |  |
| WBC count (10^9/L) |  |  |  | <0.001 |
| ≤4.02 | 114 (20.28) | 1 (1.47) | 113 (22.87) |  |
| ＞4.02 | 448 (79.72) | 67 (98.53) | 381 (77.13) |  |
| RBC count (10^12/L) |  |  |  | 0.724 |
| ≤4.74 | 317 (56.41) | 37 (54.41) | 280 (56.68) |  |
| ＞4.74 | 245 (43.59) | 31 (45.59) | 214 (43.32) |  |
| HB (g/L) |  |  |  | 0.763 |
| ≤149 | 340 (60.5) | 40 (58.82) | 300 (60.73) |  |
| ＞149 | 222 (39.5) | 28 (41.18) | 194 (39.27) |  |
| PLT (10^9/L) |  |  |  | 0.136 |
| ≤134 | 194 (34.52) | 18 (26.47) | 176 (35.63) |  |
| ＞134 | 368 (65.48) | 50 (73.53) | 318 (64.37) |  |
| NLR |  |  |  | <0.001 |
| ≤3.32 | 496 (88.26) | 38 (55.88) | 458 (92.71) |  |
| ＞3.32 | 66 (11.74) | 30 (44.12) | 36 (7.29) |  |
| PLR |  |  |  | <0.001 |
| ≤158.76 | 505 (89.86) | 51 (75.00) | 454 (91.90) |  |
| ≥158.76 | 57 (10.14) | 17 (25.00) | 40 (8.10) |  |
| LMR |  |  |  | <0.001 |
| ≤2.51 | 68 (12.1) | 22 (32.35) | 46 (9.31) |  |
| ＞2.51 | 494 (87.9) | 46 (67.65) | 448 (90.69) |  |
| ALB (g/L) |  |  |  | 0.034 |
| ≤49.9 | 504 (89.68) | 56 (82.35) | 448 (90.69) |  |
| ＞49.9 | 58 (10.32) | 12 (17.65) | 46 (9.31) |  |
| TBIL (μmol/L) |  |  |  | 0.263 |
| ≤13.57 | 156 (27.76) | 15 (22.06) | 141 (28.54) |  |
| ＞13.57 | 406 (72.24) | 53 (77.94) | 353 (71.46) |  |
| DBIL (μmol/L) |  |  |  | 0.111 |
| ≤7.79 | 424 (75.44) | 46 (67.65) | 378 (76.52) |  |
| ＞7.79 | 138 (24.56) | 22 (32.35) | 116 (23.48) |  |
| IBIL (μmol/L) |  |  |  | 0.114 |
| ≤9.8 | 197 (35.05) | 18 (26.47) | 179 (36.23) |  |
| ＞9.8 | 365 (64.95) | 50 (73.53) | 315 (63.77) |  |
| ALP (μmol/L) |  |  |  | 0.358 |
| ≤115 | 498 (88.61) | 58 (85.29) | 440 (89.07) |  |
| ＞115 | 64 (11.39) | 10 (14.71) | 54 (10.93) |  |
| GGT (μmol/L) |  |  |  | 0.091 |
| ≤42.7 | 326 (58.01) | 33 (48.53) | 293 (59.31) |  |
| ＞42.7 | 236 (41.99) | 35 (51.47) | 201 (40.69) |  |
| ALT (U/L) |  |  |  | 0.636 |
| ≤40 | 505 (89.86) | 60 (88.24) | 445 (90.08) |  |
| ＞40 | 57 (10.14) | 8 (11.76) | 49 (9.92) |  |
| AST (U/L) |  |  |  | 0.373 |
| ≤32.04 | 366 (65.12) | 41 (60.29) | 325 (65.79) |  |
| ＞32.04 | 196 (34.88) | 27 (39.71) | 169 (34.21) |  |
| Largest tumor size (cm) |  |  |  | 0.009 |
| ≤4.5 | 361 (64.23) | 34 (50.00) | 327 (66.19) |  |
| ＞4.5 | 201 (35.77) | 34 (50.00) | 167 (33.81) |  |
| Tumor number |  |  |  | 0.691 |
| Single | 523 (93.06) | 62 (91.18) | 461 (93.32) |  |
| Multiple | 39 (6.94) | 6 (8.82) | 33 (6.68) |  |
| Differentiation |  |  |  | 0.074 |
| I-Ⅱ | 313 (55.69) | 31 (45.59) | 282 (57.09) |  |
| Ⅲ-Ⅳ | 249 (44.31) | 37 (54.41) | 212 (42.91) |  |
| Microvascular invasion |  |  |  | 0.367 |
| No | 285 (50.71) | 31 (45.59) | 254 (51.42) |  |
| Yes | 277 (49.29) | 37 (54.41) | 240 (48.58) |  |
| Capsular invasion |  |  |  | 0.714 |
| No | 319 (56.76) | 40 (58.82) | 279 (56.48) |  |
| Yes | 243 (43.24) | 28 (41.18) | 215 (43.52) |  |
| Satellite nodules |  |  |  | 0.296 |
| No | 493 (87.72) | 57 (83.82) | 436 (88.26) |  |
| Yes | 69 (12.28) | 11 (16.18) | 58 (11.74) |  |
| Cirrhosis |  |  |  | 0.073 |
| No | 217 (38.61) | 33 (48.53) | 184 (37.25) |  |
| Yes | 345 (61.39) | 35 (51.47) | 310 (62.75) |  |
| TNM stage |  |  |  | 0.023 |
| Ⅰ | 271 (48.22) | 246 (49.80) | 25 (36.76) |  |
| Ⅱ | 264 (46.98) | 228 (46.15) | 36 (52.94) |  |
| Ⅲ | 27 (4.8) | 20 (4.05) | 7 (10.29) |  |
| BCLC stage |  |  |  | 0.267 |
| 0 | 81 (14.41) | 74 (14.98) | 7 (10.29) |  |
| A | 457 (81.32) | 401 (81.17) | 56 (82.35) |  |
| B | 24 (4.27) | 19 (3.85) | 5 (7.35) |  |
| CNLC stage |  |  |  | 0.118 |
| Ⅰ | 279 (49.64) | 252 (51.01) | 27 (39.71) |  |
| Ⅱ | 6 (1.07) | 6 (1.21) | 0 (0.00) |  |
| Ⅲ | 277 (49.29) | 236 (47.77) | 41 (60.29) |  |

**Note:** Results are presented as n (%) for qualitative data.

**Abbreviations:** P, p value; HbsAg, Hepatitis B surface antigen; AFP, alpha-fetoprotein; WBC, white blood cell; RBC, red blood cell; HB, Hemoglobin; PLT, platelet count; NER,neutrophil-to-eosinophil ratio; NLR, neutrophil-to-lymphocyte ratio;

PLR, platelet-to-lymphocyte ratio; LMR, lymphocyte-to-monocyte ratio; Alb, albumin; TBIL,total bilirubin; DBIL, direct bilirubin; IBIL, indirect Bilirubin; ALP, alkaline phosphatase;

GGT, γ‐glutamyl transpeptidase; ALT, alanine aminotransferase;

AST, aspartate aminotransferase; TNM, American Joint Committee on Cancer tumor-node-metastasis; BCLC, Barcelona Clinic Liver Cancer; CNLC, China liver cancer staging.

**Supplementary Table 2**

Univariate and multivariate Cox regression analyses of risk factors associated with progression-free survival (PFS) after surgery in the total cohort

| Variables | Univariate analysis | | Multivariate analysis | |
| --- | --- | --- | --- | --- |
|  | HR (95%CI) | P | HR (95%CI) | P |
| Gender |  |  |  |  |
| Female |  |  |  |  |
| Male | 0.81 (0.62 - 1.07) | 0.134 |  |  |
| Age (years) |  |  |  |  |
| ≤47 |  |  |  |  |
| ＞47 | 1.35 (1.03 - 1.78) | 0.033 | 1.46 (1.09 - 1.95) | 0.011 |
| HbsAg (ng/ml) |  |  |  |  |
| Negative |  |  |  |  |
| Positive | 1.09 (0.75 - 1.58) | 0.659 |  |  |
| AFP (ng/ml) |  |  |  |  |
| ≤400 |  |  |  |  |
| ＞400 | 1.56 (1.26 - 1.95) | <0.001 | 1.22 (0.97 - 1.54) | 0.094 |
| Neutrophil count (10^9/L) |  |  |  |  |
| ≤4.7 |  |  |  |  |
| ＞4.7 | 1.73 (1.28 - 2.34) | <0.001 | 1.08 (0.74 - 1.58) | 0.676 |
| Lymphocyte count (10^9/L) |  |  |  |  |
| ≤1.01 |  |  |  |  |
| ＞1.01 | 1.49 (1.12 - 1.97) | 0.006 | 1.15 (0.79 - 1.68) | 0.454 |
| Monocyte count (10^9/L) |  |  |  |  |
| ≤0.59 |  |  |  |  |
| ＞0.59 | 1.48 (1.14 - 1.91) | 0.003 | 1.07 (0.79 - 1.45) | 0.675 |
| Basophil count (10^9/L) |  |  |  |  |
| ≤0.01 |  |  |  |  |
| ＞0.01 | 1.04 (0.85 - 1.28) | 0.672 |  |  |
| Eosinophil count (10^9/L) |  |  |  |  |
| ≤0.03 |  |  |  |  |
| ＞0.03 | 1.36 (1.03 - 1.78) | 0.029 | 0.70 (0.46 - 1.06) | 0.091 |
| WBC count (10^9/L) |  |  |  |  |
| ≤4.02 |  |  |  |  |
| ＞4.02 | 0.78 (0.60 - 1.00) | 0.051 |  |  |
| RBC count (10^12/L) |  |  |  |  |
| ≤4.74 |  |  |  |  |
| ＞4.74 | 1.34 (1.10 - 1.65) | 0.005 | 1.26 (0.91 - 1.75) | 0.158 |
| HB (g/L) |  |  |  |  |
| ≤149 |  |  |  |  |
| ＞149 | 1.31 (1.06 - 1.61) | 0.011 | 1.12 (0.80 - 1.56) | 0.521 |
| PLT (10^9/L) |  |  |  |  |
| ≤134 |  |  |  |  |
| ＞134 | 0.81 (0.65 - 0.99) | 0.044 | 0.81 (0.64 - 1.03) | 0.091 |
| NER |  |  |  |  |
| ≤102.00 |  |  |  |  |
| ＞102.00 | 1.93 (1.46 - 2.55) | <0.001 | 2.05 (1.30 - 3.22) | 0.002 |
| NLR |  |  |  |  |
| ≤3.32 |  |  |  |  |
| ＞3.32 | 2.17 (1.65 - 2.87) | <0.001 | 1.21 (0.80 - 1.83) | 0.356 |
| PLR |  |  |  |  |
| ≤158.76 |  |  |  |  |
| ≥158.76 | 1.75 (1.29 - 2.38) | <0.001 | 0.91 (0.63 - 1.30) | 0.592 |
| LMR |  |  |  |  |
| ≤2.51 |  |  |  |  |
| ＞2.51 | 1.72 (1.30 - 2.27) | <0.001 | 1.05 (0.72 - 1.52) | 0.797 |
| ALB (g/L) |  |  |  |  |
| ≤49.9 |  |  |  |  |
| ＞49.9 | 0.77 (0.56 - 1.05) | 0.100 |  |  |
| TBIL (μmol/L) |  |  |  |  |
| ≤13.57 |  |  |  |  |
| ＞13.57 | 1.21 (0.97 - 1.50) | 0.084 |  |  |
| DBIL (μmol/L) |  |  |  |  |
| ≤7.79 |  |  |  |  |
| ＞7.79 | 0.83 (0.66 - 1.05) | 0.126 |  |  |
| IBIL (μmol/L) |  |  |  |  |
| ≤9.8 |  |  |  |  |
| ＞9.8 | 1.18 (0.96 - 1.45) | 0.112 |  |  |
| ALP (μmol/L) |  |  |  |  |
| ≤115 |  |  |  |  |
| ＞115 | 0.69 (0.51 - 0.92) | 0.011 | 1.04 (0.76 - 1.42) | 0.813 |
| GGT (μmol/L) |  |  |  |  |
| ≤42.7 |  |  |  |  |
| ＞42.7 | 1.66 (1.36 - 2.02) | <0.001 | 1.37 (1.10 - 1.72) | 0.006 |
| ALT (U/L) |  |  |  |  |
| ≤40 |  |  |  |  |
| ＞40 | 0.76 (0.53 - 1.08) | 0.126 |  |  |
| AST (U/L) |  |  |  |  |
| ≤32.04 |  |  |  |  |
| ＞32.04 | 1.49 (1.22 - 1.83) | <0.001 | 1.15 (0.91 - 1.44) | 0.244 |
| Largest tumor size (cm) |  |  |  |  |
| ≤4.5 |  |  |  |  |
| ＞4.5 | 1.88 (1.53 - 2.30) | <0.001 | 1.44 (1.13 - 1.82) | 0.003 |
| Tumor number |  |  |  |  |
| Single |  |  |  |  |
| Multiple | 2.10 (1.49 - 2.97) | <0.001 | 1.73 (1.20 - 2.50) | 0.003 |
| Differentiation |  |  |  |  |
| I-Ⅱ |  |  |  |  |
| Ⅲ-Ⅳ | 1.45 (1.19 - 1.78) | <0.001 | 1.01 (0.80 - 1.27) | 0.957 |
| Microvascular invasion |  |  |  |  |
| No |  |  |  |  |
| Yes | 0.59 (0.48 - 0.72) | <0.001 | 0.75 (0.60 - 0.96) | 0.019 |
| Capsular invasion |  |  |  |  |
| No |  |  |  |  |
| Yes | 0.67 (0.55 - 0.82) | <0.001 | 0.87 (0.70 - 1.09) | 0.219 |
| Satellite nodules |  |  |  |  |
| No |  |  |  |  |
| Yes | 2.03 (1.54 - 2.69) | <0.001 | 1.40 (1.02 - 1.92) | 0.035 |
| Cirrhosis |  |  |  |  |
| No |  |  |  |  |
| Yes | 1.04 (0.85 - 1.28) | 0.675 |  |  |
| TNM |  |  |  |  |
| Ⅰ |  |  |  |  |
| Ⅱ | 1.63 (1.33 - 2.01) | <0.001 | 1.71 (0.76 - 3.88) | 0.196 |
| Ⅲ | 2.84 (1.83 - 4.40) | <0.001 | 1.23 (0.39 - 3.95) | 0.723 |
| BCLC |  |  |  |  |
| 0 |  |  |  |  |
| A | 0.85 (0.64 - 1.14) | 0.286 | 0.97 (0.72 - 1.31) | 0.862 |
| B | 2.73 (1.75 - 4.26) | <0.001 | 5.00 (1.94 - 12.92) | <0.001 |
| CNLC |  |  |  |  |
| Ⅰ |  |  |  |  |
| Ⅱ | 1.69 (1.38 - 2.07) | <0.001 | 0.95 (0.42 - 2.15) | 0.906 |
| Ⅲ | 1.31 (0.49 - 3.54) | 0.591 | 0.17 (0.04 - 0.75) | 0.020 |

**Note:** Results are presented as n (%) for qualitative data.

**Abbreviations:** HR, hazard ratio; CI, confidence interval; P, p value; HbsAg, Hepatitis B surface antigen; AFP, alpha-fetoprotein; WBC, white blood cell; RBC, red blood cell; HB, Hemoglobin; PLT, platelet count; NER, neutrophil-to-eosinophil ratio; NLR, neutrophil-to-lymphocyte ratio; PLR, platelet-to-lymphocyte ratio; LMR,

lymphocyte-to-monocyte ratio; Alb, albumin; TBIL, total bilirubin; DBIL, direct bilirubin; IBIL, indirect bilirubin; ALP, alkaline phosphatase; GGT, γ‐glutamyl transpeptidase;

ALT, alanine aminotransferase; AST, aspartate aminotransferase;

TNM, American Joint Committee on Cancer tumor-node-metastasis; BCLC, Barcelona Clinic Liver Cancer; CNLC, China liver cancer staging.

**Supplementary Table 3**

The clinicopathologic characteristics of patients in the training and validation cohorts

| Variable | Total  (n = 562) | Training cohort  (n = 393) | Validation cohort  (n = 169) | P |
| --- | --- | --- | --- | --- |
| Gender |  |  |  | 0.453 |
| Female | 93 (16.55) | 62 (15.78) | 31 (18.34) |  |
| Male | 469 (83.45) | 331 (84.22) | 138 (81.66) |  |
| Age (years) |  |  |  | 0.498 |
| ≤47 | 78 (13.88) | 52 (13.23) | 26 (15.38) |  |
| ＞47 | 484 (86.12) | 341 (86.77) | 143 (84.62) |  |
| HbsAg (ng/ml) |  |  |  | 0.569 |
| Negative | 42 (7.47) | 31 (7.89) | 11 (6.51) |  |
| Positive | 520 (92.53) | 362 (92.11) | 158 (93.49) |  |
| AFP (ng/ml) |  |  |  | 0.066 |
| ≤400 | 415 (73.84) | 299 (76.08) | 116 (68.64) |  |
| ＞400 | 147 (26.16) | 94 (23.92) | 53 (31.36) |  |
| Neutrophil count (10^9/L) |  |  |  | 0.706 |
| ≤4.7 | 503 (89.5) | 353 (89.82) | 150 (88.76) |  |
| ＞4.7 | 59 (10.5) | 40 (10.18) | 19 (11.24) |  |
| Lymphocyte count (10^9/L) |  |  |  | 0.575 |
| ≤1.01 | 73 (12.99) | 49 (12.47) | 24 (14.20) |  |
| ＞1.01 | 489 (87.01) | 344 (87.53) | 145 (85.80) |  |
| Monocyte count (10^9/L) |  |  |  | 0.371 |
| ≤0.59 | 474 (84.34) | 335 (85.24) | 139 (82.25) |  |
| ＞0.59 | 88 (15.66) | 58 (14.76) | 30 (17.75) |  |
| Basophil count (10^9/L) |  |  |  | 0.063 |
| ≤0.01 | 219 (38.97) | 163 (41.48) | 56 (33.14) |  |
| ＞0.01 | 343 (61.03) | 230 (58.52) | 113 (66.86) |  |
| Eosinophil count (10^9/L) |  |  |  | 0.781 |
| ≤0.03 | 80 (14.23) | 57 (14.50) | 23 (13.61) |  |
| ＞0.03 | 482 (85.77) | 336 (85.50) | 146 (86.39) |  |
| WBC count (10^9/L) |  |  |  | 0.453 |
| ≤4.02 | 114 (20.28) | 83 (21.12) | 31 (18.34) |  |
| ＞4.02 | 448 (79.72) | 310 (78.88) | 138 (81.66) |  |
| RBC count (10^12/L) |  |  |  | 0.537 |
| ≤4.74 | 317 (56.41) | 225 (57.25) | 92 (54.44) |  |
| ＞4.74 | 245 (43.59) | 168 (42.75) | 77 (45.56) |  |
| HB (g/L) |  |  |  | 0.964 |
| ≤149 | 340 (60.5) | 238 (60.56) | 102 (60.36) |  |
| ＞149 | 222 (39.5) | 155 (39.44) | 67 (39.64) |  |
| PLT (10^9/L) |  |  |  | 0.479 |
| ≤134 | 194 (34.52) | 132 (33.59) | 62 (36.69) |  |
| ＞134 | 368 (65.48) | 261 (66.41) | 107 (63.31) |  |
| NER |  |  |  | 0.472 |
| ≤102.00 | 494 (87.9) | 348 (88.55) | 146 (86.39) |  |
| ＞102.00 | 68 (12.1) | 45 (11.45) | 23 (13.61) |  |
| NLR |  |  |  | 0.235 |
| ≤3.32 | 496 (88.26) | 351 (89.31) | 145 (85.80) |  |
| ＞3.32 | 66 (11.74) | 42 (10.69) | 24 (14.20) |  |
| PLR |  |  |  | 0.571 |
| ≤158.76 | 505 (89.86) | 355 (90.33) | 150 (88.76) |  |
| ≥158.76 | 57 (10.14) | 38 (9.67) | 19 (11.24) |  |
| LMR |  |  |  | 0.662 |
| ≤2.51 | 68 (12.1) | 46 (11.70) | 22 (13.02) |  |
| ＞2.51 | 494 (87.9) | 347 (88.30) | 147 (86.98) |  |
| ALB (g/L) |  |  |  | 0.051 |
| ≤49.9 | 504 (89.68) | 346 (88.04) | 158 (93.49) |  |
| ＞49.9 | 58 (10.32) | 47 (11.96) | 11 (6.51) |  |
| TBIL (μmol/L) |  |  |  | 0.526 |
| ≤13.57 | 156 (27.76) | 106 (26.97) | 50 (29.59) |  |
| ＞13.57 | 406 (72.24) | 287 (73.03) | 119 (70.41) |  |
| DBIL (μmol/L) |  |  |  | 0.593 |
| ≤7.79 | 424 (75.44) | 294 (74.81) | 130 (76.92) |  |
| ＞7.79 | 138 (24.56) | 99 (25.19) | 39 (23.08) |  |
| IBIL (μmol/L) |  |  |  | 0.359 |
| ≤9.8 | 197 (35.05) | 133 (33.84) | 64 (37.87) |  |
| ＞9.8 | 365 (64.95) | 260 (66.16) | 105 (62.13) |  |
| ALP (μmol/L) |  |  |  | 0.943 |
| ≤115 | 498 (88.61) | 348 (88.55) | 150 (88.76) |  |
| ＞115 | 64 (11.39) | 45 (11.45) | 19 (11.24) |  |
| GGT (μmol/L) |  |  |  | 0.261 |
| ≤42.7 | 326 (58.01) | 234 (59.54) | 92 (54.44) |  |
| ＞42.7 | 236 (41.99) | 159 (40.46) | 77 (45.56) |  |
| ALT (U/L) |  |  |  | 0.793 |
| ≤40 | 505 (89.86) | 354 (90.08) | 151 (89.35) |  |
| ＞40 | 57 (10.14) | 39 (9.92) | 18 (10.65) |  |
| AST (U/L) |  |  |  | 0.447 |
| ≤32.04 | 366 (65.12) | 252 (64.12) | 114 (67.46) |  |
| ＞32.04 | 196 (34.88) | 141 (35.88) | 55 (32.54) |  |
| Largest tumor size (cm) |  |  |  | 0.067 |
| ≤4.5 | 361 (64.23) | 262 (66.67) | 99 (58.58) |  |
| ＞4.5 | 201 (35.77) | 131 (33.33) | 70 (41.42) |  |
| Tumor number |  |  |  | 0.532 |
| Single | 523 (93.06) | 364 (92.62) | 159 (94.08) |  |
| Multiple | 39 (6.94) | 29 (7.38) | 10 (5.92) |  |
| Differentiation |  |  |  | 0.563 |
| I-Ⅱ | 313 (55.69) | 222 (56.49) | 91 (53.85) |  |
| Ⅲ-Ⅳ | 249 (44.31) | 171 (43.51) | 78 (46.15) |  |
| Microvascular invasion |  |  |  | 0.294 |
| No | 285 (50.71) | 205 (52.16) | 80 (47.34) |  |
| Yes | 277 (49.29) | 188 (47.84) | 89 (52.66) |  |
| Capsular invasion |  |  |  | 0.720 |
| No | 319 (56.76) | 225 (57.25) | 94 (55.62) |  |
| Yes | 243 (43.24) | 168 (42.75) | 75 (44.38) |  |
| Satellite nodules |  |  |  | 0.528 |
| No | 493 (87.72) | 347 (88.30) | 146 (86.39) |  |
| Yes | 69 (12.28) | 46 (11.70) | 23 (13.61) |  |
| Cirrhosis |  |  |  | 0.421 |
| No | 217 (38.61) | 156 (39.69) | 61 (36.09) |  |
| Yes | 345 (61.39) | 237 (60.31) | 108 (63.91) |  |

**Note:** Results are presented as n (%) for qualitative data.

**Abbreviations:** P, p value; HbsAg, Hepatitis B surface antigen;

AFP, alpha-fetoprotein; WBC, white blood cell; RBC, red blood cell;

HB, Hemoglobin; PLT, platelet count; NER, neutrophil-to-eosinophil ratio;

NLR, neutrophil-to-lymphocyte ratio; PLR, platelet-to-lymphocyte ratio;

LMR, lymphocyte-to-monocyte ratio; Alb, albumin; TBIL, total bilirubin;

DBIL, direct bilirubin; IBIL, indirect Bilirubin;ALP, alkaline phosphatase;

GGT, γ‐glutamyl transpeptidase; ALT, alanine aminotransferase;

AST, aspartate aminotransferase.

**Supplementary Figure 1**


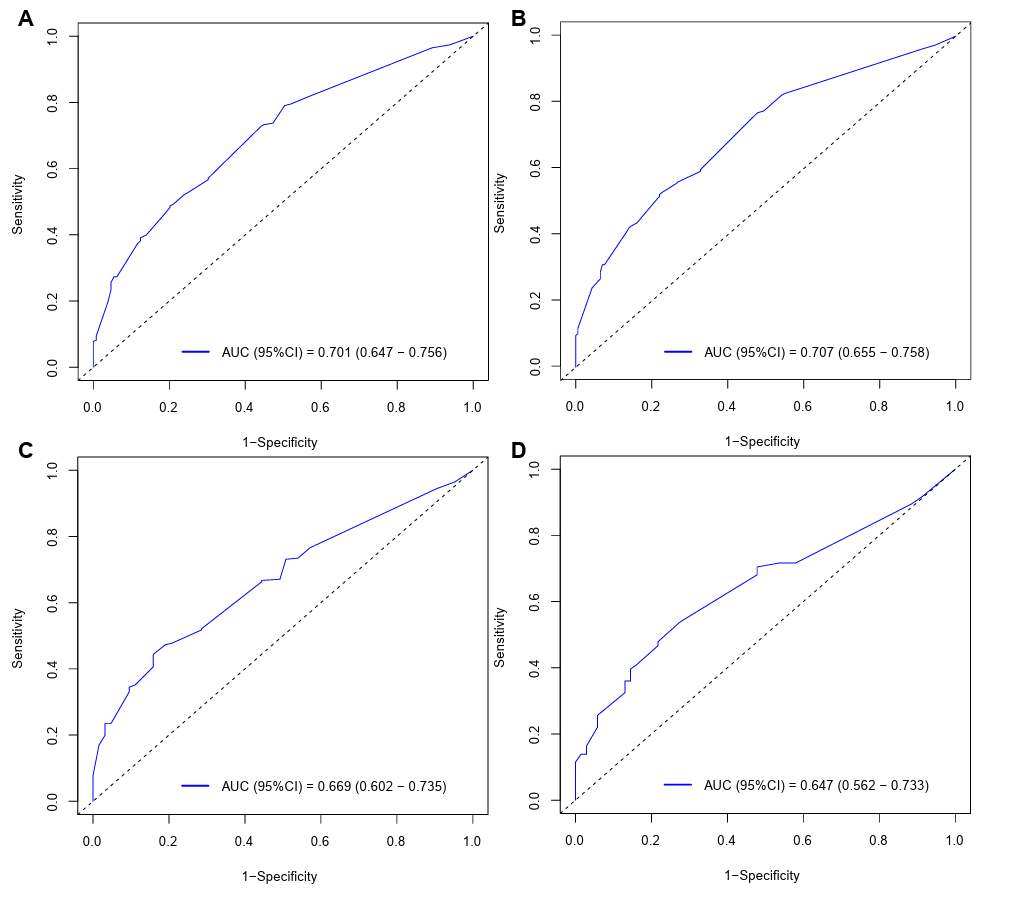


**Supplementary Fig. 1** Receiver operating characteristic (ROC) curve for NER (A), NLR(B), PLR(C), and LMR (D).
